# Supplementary material
Source: Springer Nature journal article supplement (https://www.springermedizin.de/resource/supplementary/12913_2011_2041_MOESM1_ESM.pdf/9529670)

# International Classification of Disease Coding Classes of Canadian Provinces and Territories, Fiscal Years 1992 to 2006

|                |     | 92                                                              | 93                                                              | 94                                                              | 95                                                              | 96                                                              | 97                                                              | 98                                                              | 99         | 00         | 01                           | 02                                                              | 03                           | 04            | 05            | 06            |
|----------------|-----|-----------------------------------------------------------------|-----------------------------------------------------------------|-----------------------------------------------------------------|-----------------------------------------------------------------|-----------------------------------------------------------------|-----------------------------------------------------------------|-----------------------------------------------------------------|------------|------------|------------------------------|-----------------------------------------------------------------|------------------------------|---------------|---------------|---------------|
| Eastern Canada | NL  | ICD-9 /CCP                                                      | ICD-9 /CCP | ICD-9 /CCP | ICD-10-CA/CCI                | ICD-10-CA/CCI                                                   | ICD-10-CA/CCI                | ICD-10-CA/CCI | ICD-10-CA/CCI | ICD-10-CA/CCI |
|                | PEI | ICD-9 /CCP                                                      | ICD-9 /CCP | ICD-9 /CCP | ICD-10-CA/CCI                | ICD-10-CA/CCI                                                   | ICD-10-CA/CCI                | ICD-10-CA/CCI | ICD-10-CA/CCI | ICD-10-CA/CCI |
|                | NS  | Non-linkable data or no data was submitted for that fiscal year | ICD-9 /CCP                                                      | ICD-9 /CCP | ICD-9 /CCP | ICD-10-CA/CCI                | ICD-10-CA/CCI                                                   | ICD-10-CA/CCI                | ICD-10-CA/CCI | ICD-10-CA/CCI | ICD-10-CA/CCI |
|                | NB  | ICD-9 /CCP                                                      | ICD-9 /CCP | ICD-9 /CCP | ICD-9 /CCP                   | ICD-9-CM/ICD-9-CM procedures                                    | ICD-9-CM/ICD-9-CM procedures | ICD-10-CA/CCI | ICD-10-CA/CCI | ICD-10-CA/CCI |
| Central Canada | QC  | Non-linkable data or no data was submitted for that fiscal year | ICD-9 /CCP                                                      | ICD-9 /CCP | ICD-9 /CCP | ICD-9 /CCP                   | ICD-9 /CCP                                                      | ICD-9 /CCP                   | ICD-9 /CCP    | ICD-9 /CCP    | ICD-10-CA/CCI |
|                | ON  | ICD-9 /CCP                                                      | ICD-9 /CCP | ICD-9 /CCP | ICD-9-CM/ICD-9-CM procedures | ICD-10-CA/CCI                                                   | ICD-10-CA/CCI                | ICD-10-CA/CCI | ICD-10-CA/CCI | ICD-10-CA/CCI |
| Western Canada | MB  | ICD-9 /CCP                                                      | ICD-9 /CCP | ICD-9 /CCP | ICD-9-CM/ICD-9-CM procedures | ICD-9-CM/ICD-9-CM procedures                                    | ICD-9-CM/ICD-9-CM procedures | ICD-10-CA/CCI | ICD-10-CA/CCI | ICD-10-CA/CCI |
|                | SK  | ICD-9 /CCP                                                      | ICD-9 /CCP | ICD-9 /CCP | ICD-9 /CCP                   | ICD-10-CA/CCI                                                   | ICD-10-CA/CCI                | ICD-10-CA/CCI | ICD-10-CA/CCI | ICD-10-CA/CCI |
|                | AB  | Non-linkable data or no data was submitted for that fiscal year | Non-linkable data or no data was submitted for that fiscal year | ICD-9 /CCP                                                      | ICD-9 /CCP | ICD-9 /CCP | ICD-9 /CCP                   | ICD-9-CM/ICD-9-CM procedures                                    | ICD-10-CA/CCI                | ICD-10-CA/CCI | ICD-10-CA/CCI | ICD-10-CA/CCI |
|                | BC  | Non-linkable data or no data was submitted for that fiscal year | Non-linkable data or no data was submitted for that fiscal year | ICD-9 /CCP                                                      | ICD-9 /CCP | ICD-9 /CCP | ICD-9 /CCP                   | ICD-10-CA/CCI                                                   | ICD-10-CA/CCI                | ICD-10-CA/CCI | ICD-10-CA/CCI | ICD-10-CA/CCI |
| Territories    | YT  | Non-linkable data or no data was submitted for that fiscal year | Non-linkable data or no data was submitted for that fiscal year | Non-linkable data or no data was submitted for that fiscal year | Non-linkable data or no data was submitted for that fiscal year | Non-linkable data or no data was submitted for that fiscal year | ICD-9 /CCP                                                      | ICD-9 /CCP                                                      | ICD-9 /CCP | ICD-9 /CCP | ICD-10-CA/CCI                | ICD-10-CA/CCI                                                   | ICD-10-CA/CCI                | ICD-10-CA/CCI | ICD-10-CA/CCI | ICD-10-CA/CCI |
|                | NT  | Non-linkable data or no data was submitted for that fiscal year | ICD-9 /CCP                                                      | ICD-9 /CCP | ICD-9 /CCP | ICD-9 /CCP                   | ICD-9-CM/ICD-9-CM procedures                                    | ICD-10-CA/CCI                | ICD-10-CA/CCI | ICD-10-CA/CCI | ICD-10-CA/CCI |
|                | NU  | Non-linkable data or no data was submitted for that fiscal year | Non-linkable data or no data was submitted for that fiscal year | Non-linkable data or no data was submitted for that fiscal year | Non-linkable data or no data was submitted for that fiscal year | Non-linkable data or no data was submitted for that fiscal year | Non-linkable data or no data was submitted for that fiscal year | Non-linkable data or no data was submitted for that fiscal year | ICD-9 /CCP | ICD-9 /CCP | ICD-9-CM/ICD-9-CM procedures | Non-linkable data or no data was submitted for that fiscal year | ICD-10-CA/CCI                | ICD-10-CA/CCI | ICD-10-CA/CCI | ICD-10-CA/CCI |

\* Note: NL=Newfoundland and Labrador, PEI=Prince Edward Island, NS=Nova Scotia, NB=New Brunswick, QC=Quebec, MB=Manitoba, SK=Saskatchewan, AB=Alberta, BC=British Columbia, YT=Yukon Territory, NT=North West Territory, NU=Nunavut, ICD=International Classification of Disease

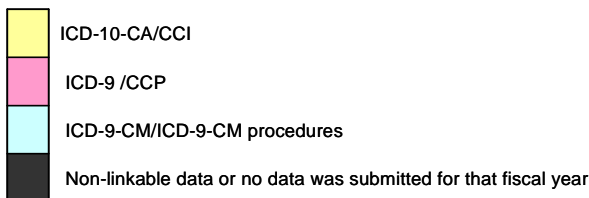

Supplement: MOESM1 [file 9529670]
